# Supplementary material
Source: Springer Nature journal article supplement (https://springermedizin.de/resource/supplementary/13063_2011_669_MOESM1_ESM.pdf/9618464)
Supplement: MOESM1 [file 9618464]

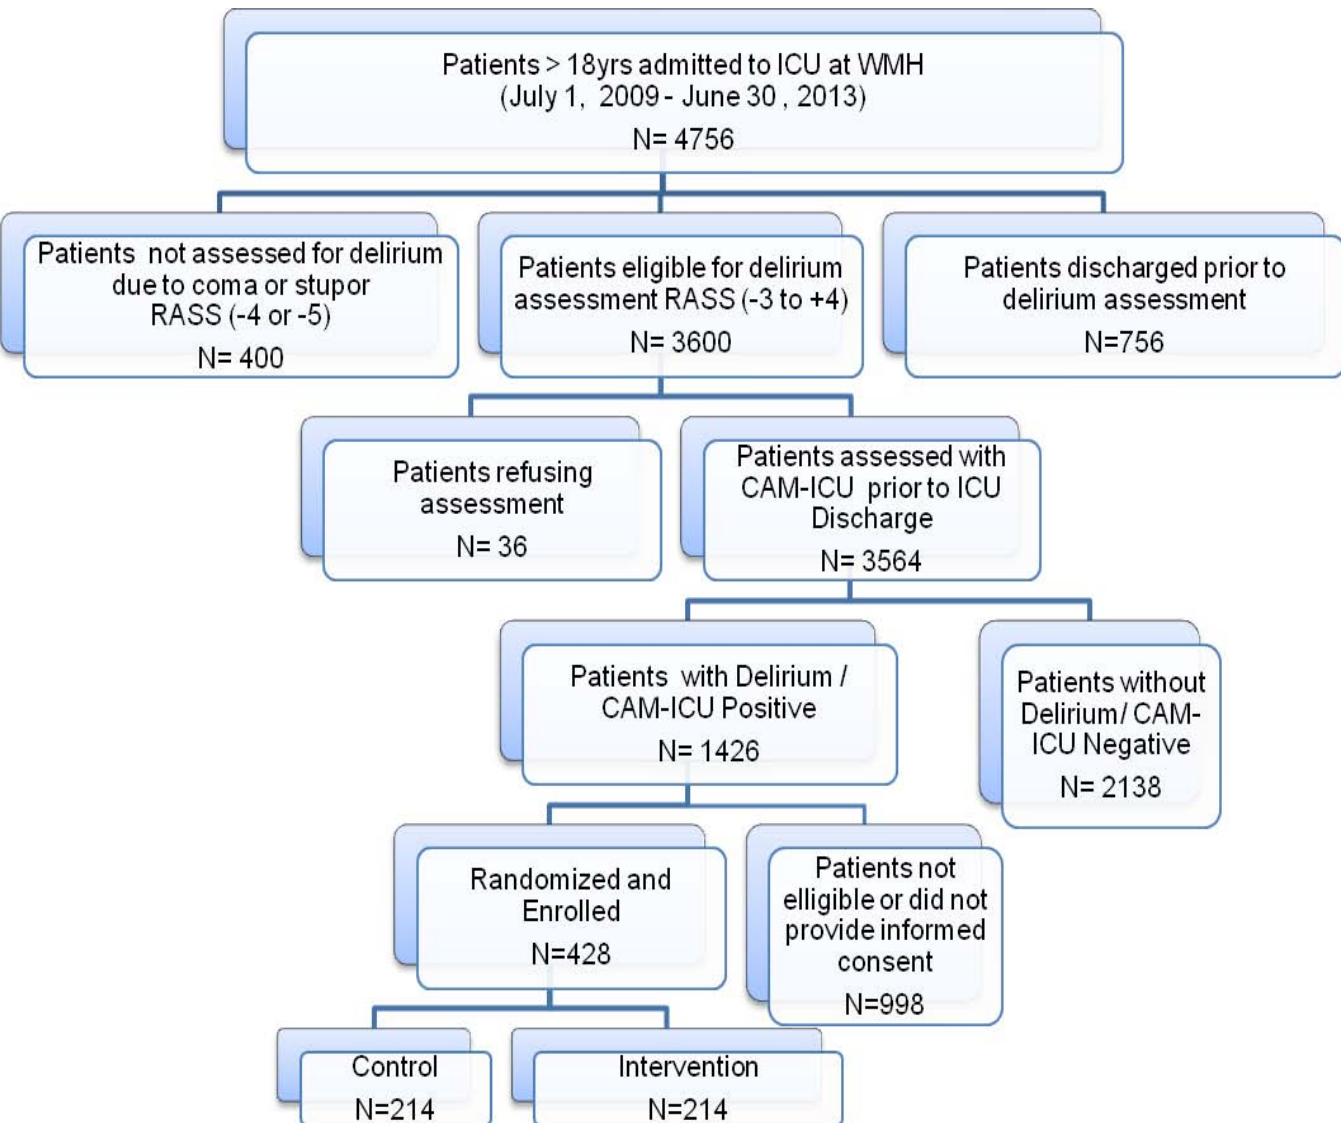

Patients > 18yrs admitted to ICU at WMH  
(July 1, 2009 - June 30, 2013)  
N= 4756

Patients not assessed for delirium  
due to coma or stupor  
RASS (-4 or -5)  
N= 400

Patients eligible for delirium  
assessment RASS (-3 to +4)  
N= 3600

Patients discharged prior to  
delirium assessment  
N=756

Patients refusing  
assessment  
N= 36

Patients assessed with  
CAM-ICU prior to ICU  
Discharge  
N= 3564

Patients with Delirium /  
CAM-ICU Positive  
N= 1426

Patients without  
Delirium/ CAM-  
ICU Negative  
N= 2138

Randomized and  
Enrolled  
N=428

Patients not  
eligible or did not  
provide informed  
consent  
N=998

Control  
N=214

Intervention  
N=214
